# Supplementary material for: Opposing effects of oxidative challenge and carotenoids on antioxidant status and condition-dependent sexual signalling
Source: PubMed Central journal article supplement (PMC4802301; doi:10.1038/srep23546), 2016-03-22
Supplement: srep23546-s1.pdf [file srep23546-s1.pdf]

22 **Supplementary Table S1.** Group mean values and SD of measured variables at the beginning of the  
 23 experiment.

| <b>Treatment group</b>           | <b>ROS- CAR-</b> |                   | <b>ROS- CAR+</b> |                   | <b>ROS+ CAR-</b> |                   | <b>ROS+ CAR+</b> |                   |
|----------------------------------|------------------|-------------------|------------------|-------------------|------------------|-------------------|------------------|-------------------|
| <b>Variable</b>                  | <b>N</b>         | <b>Mean (SD)</b>  | <b>N</b>         | <b>Mean (SD)</b>  | <b>N</b>         | <b>Mean (SD)</b>  | <b>N</b>         | <b>Mean (SD)</b>  |
| Beak red chroma                  | 15               | 0.85<br>(0.04)    | 15               | 0.85<br>(0.03)    | 15               | 0.85<br>(0.03)    | 15               | 0.86<br>(0.03)    |
| Beak hue (nm)                    | 15               | 590.33<br>(2.87)  | 15               | 590.20<br>(2.21)  | 15               | 588.93<br>(3.76)  | 15               | 589.07<br>(3.37)  |
| Beak UV chroma                   | 15               | 0.018<br>(0.022)  | 15               | 0.015<br>(0.018)  | 15               | 0.011<br>(0.012)  | 15               | 0.007<br>(0.009)  |
| Total plasma carotenoids (µg/mL) | 14               | 27.43<br>(3.18)   | 12               | 27.39<br>(8.36)   | 13               | 26.39<br>(5.18)   | 12               | 26.59<br>(7.93)   |
| Plasma lutein (µg/mL)            | 14               | 18.06<br>(3.17)   | 12               | 17.70<br>(4.52)   | 13               | 17.08<br>(3.01)   | 12               | 17.73<br>(5.40)   |
| Plasma zeaxanthin (µg/mL)        | 14               | 1.32<br>(0.85)    | 10               | 1.57<br>(1.07)    | 13               | 1.21<br>(0.56)    | 10               | 1.36<br>(1.43)    |
| 8-isoprostanes in RBC (pg/mL)    | 15               | 33.49<br>(6.93)   | 14               | 37.06<br>(6.57)   | 15               | 34.90<br>(3.71)   | 14               | 36.20<br>(5.09)   |
| ZE/tHODE ratio                   | 15               | 0.44<br>(0.02)    | 14               | 0.42<br>(0.02)    | 15               | 0.44<br>(0.02)    | 14               | 0.46<br>(0.01)    |
| OXY (µmol HClO/mL)               | 15               | 138.76<br>(30.16) | 15               | 139.00<br>(26.52) | 15               | 118.93<br>(27.28) | 15               | 124.23<br>(27.02) |
| Body mass (g)                    | 15               | 16.39<br>(1.65)   | 15               | 17.20<br>(1.62)   | 15               | 16.02<br>(1.40)   | 15               | 17.33<br>(1.34)   |

24

25 **Supplementary Table S2.** Group mean values and SD of measured variables at the end of the  
 26 experiment.

| Treatment group                  | ROS- CAR- |                | ROS- CAR+ |                | ROS+ CAR- |                | ROS+ CAR+ |                |
|----------------------------------|-----------|----------------|-----------|----------------|-----------|----------------|-----------|----------------|
|                                  | N         | Mean (SD)      | N         | Mean (SD)      | N         | Mean (SD)      | N         | Mean (SD)      |
| Beak red chroma                  | 15        | 0.85 (0.02)    | 15        | 0.90 (0.01)    | 13        | 0.81 (0.03)    | 13        | 0.88 (0.03)    |
| Beak hue (nm)                    | 15        | 588.33 (2.50)  | 15        | 595.73 (2.09)  | 13        | 583.69 (3.59)  | 13        | 592.38 (4.54)  |
| Beak UV chroma                   | 15        | 0.010 (0.006)  | 15        | 0.003 (0.003)  | 13        | 0.020 (0.010)  | 13        | 0.005 (0.006)  |
| Total plasma carotenoids (µg/mL) | 15        | 27.44 (4.91)   | 14        | 55.76 (13.40)  | 13        | 19.91 (6.99)   | 12        | 48.84 (17.11)  |
| Plasma lutein (µg/mL)            | 14        | 17.41 (3.46)   | 14        | 40.54 (9.63)   | 13        | 16.43 (5.17)   | 12        | 45.47 (15.02)  |
| Plasma zeaxanthin (µg/mL)        | 14        | 1.66 (0.89)    | 14        | 2.51 (1.59)    | 10        | 1.27 (0.92)    | 11        | 2.88 (1.94)    |
| 8-isoprostanes in RBC (pg/mL)    | 15        | 27.41 (4.40)   | 15        | 30.54 (4.16)   | 13        | 30.46 (4.16)   | 10        | 31.65 (4.96)   |
| ZE/tHODE ratio                   | 15        | 0.42 (0.02)    | 15        | 0.34 (0.03)    | 13        | 0.67 (0.04)    | 10        | 0.47 (0.02)    |
| OXY (µmol HClO/mL)               | 15        | 136.52 (29.97) | 15        | 133.66 (28.21) | 13        | 143.45 (42.42) | 12        | 149.62 (25.32) |
| Body mass (g)                    | 15        | 16.71 (1.85)   | 15        | 17.93 (1.75)   | 13        | 16.85 (1.55)   | 13        | 17.15 (2.41)   |

27

28 **Supplementary Table S3.** Standardised effect sizes of oxidative load (ROS) and carotenoid intake  
 29 (CAR) on beak hue and UV chroma and plasma lutein and zeaxanthin. Effect sizes are given as  
 30 standardised partial regression coefficients ( $b^*$ ) from linear models with oxidative load and carotenoid  
 31 intake as factors, initial values as covariates, and with continuous variables  $z$ -standardised. Low and  
 32 high factor levels were coded 0 and 1, respectively and centred in order to enable the main effects to  
 33 be properly interpreted without the need to remove the interaction terms from the models. Beak UV  
 34 chroma and plasma lutein were normalised using logit and Box-Cox ( $\lambda = 0.116$ ) transformation,  
 35 respectively.

| <b>Response variables</b> | <b>Standardised effect size</b> |         |          |
|---------------------------|---------------------------------|---------|----------|
| <b>Predictors</b>         | $b^*$                           | 2.5% CI | 97.5% CI |
| <b>Beak hue</b>           |                                 |         |          |
| initial                   | 0.25                            | 0.10    | 0.40     |
| ROS                       | -0.61                           | -0.91   | -0.31    |
| CAR                       | 1.42                            | 1.12    | 1.70     |
| ROS $\times$ CAR          | 0.13                            | -0.45   | 0.72     |
| <b>Beak UV chroma</b>     |                                 |         |          |
| initial                   | 0.16                            | -0.06   | 0.37     |
| ROS                       | 0.66                            | 0.23    | 1.08     |
| CAR                       | -1.09                           | -1.51   | -0.67    |
| ROS $\times$ CAR          | -0.20                           | -1.03   | 0.64     |
| <b>Plasma lutein</b>      |                                 |         |          |
| initial                   | 0.28                            | 0.15    | 0.41     |
| ROS                       | 0.05                            | -0.21   | 0.31     |
| CAR                       | 1.67                            | 1.41    | 1.93     |
| ROS $\times$ CAR          | 0.22                            | -0.30   | 0.74     |
| <b>Plasma zeaxanthin</b>  |                                 |         |          |
| initial                   | 0.53                            | 0.31    | 0.76     |
| ROS                       | -0.16                           | -0.61   | 0.28     |
| CAR                       | 0.91                            | 0.47    | 1.35     |
| ROS $\times$ CAR          | 0.05                            | -0.83   | 0.94     |

36

## 37 **Supplementary methods**

38 **HPLC analysis of carotenoids in plasma samples.** Dried organic extract of the plasma (see Material  
39 and Methods) was dissolved in a mobile phase (methanol:acetonitrile 1:1, v/v) and injected (40  $\mu$ l)  
40 into the HPLC. The HPLC system (Q-grad quaternary pump, Watrex, Czech Republic; Midas  
41 autosampler, Spark, The Netherlands) was equipped with a 4.6 x 250 mm 5  $\mu$ m C30 Develosil RP-  
42 Aqueous separation column with a C30 Develosil precolumn (Nomura Chemical Co., Japan).  
43 Methanol (A) and acetonitrile (B) were used as mobile phases for gradient elution (starting with 20%  
44 B, ramped to 45% at 30 min, 100% B from 33 to 43 min, followed by 10 min of equilibration with  
45 20% B). The flow was set to 1 mL/min and the column temperature set at 35 °C (Mistral column  
46 thermostat, Spark, The Netherlands). Absorption spectra (range 300–600 nm) were measured using a  
47 DAD UV6000LP spectrometer (Thermo Finnigan, USA). Carotenoids (adonirubin, astaxanthin,  
48 cryptoxanthin, lutein, zeaxanthin) were identified by comparison of retention times and spectra with  
49 commercially available standards (Sigma-Aldrich, Czech Republic; CaroteNature, Switzerland).  
50 Quantitation of known carotenoids was performed at 450 and 470 nm using external standards.

51

## 52 **HPLC analysis of oxidative damage and lipophilic antioxidant capacity in RBC.**

53 Standards (13-(*Z,E*)-HODE), 9-(*Z,E*)-HODE, 8-iso-prostaglandin  $F_{2\alpha}$  (8-isoprostane),  
54 9-HODE- $d_4$  and 13-HODE- $d_4$  and 8-iso-prostaglandin  $F_{2\alpha}$ - $d_4$ ) were obtained from Cayman Chemical  
55 Company (MI, USA). 9-(*E,E*)-HODE and 13-(*E,E*)-HODE were obtained from Larodan Fine  
56 Chemicals AB (Malmo, Sweden).

57 The pre-treatment step was performed according to the following procedure: internal standards  
58 9-HODE- $d_4$ , 13-HODE- $d_4$  and 8-iso-prostaglandin  $F_{2\alpha}$ - $d_4$  (each internal standard was 10 ng/50  $\mu$ L of  
59 RBC), butylated hydroxytoluene (100  $\mu$ M – antioxidant) and an extraction solution of methanol and  
60 acetonitrile (100  $\mu$ L of methanol and 100  $\mu$ L of acetonitrile/50  $\mu$ L of RBC) were added to the RBC.  
61 The mixture and RBC were sonicated for 10 min at 4 °C. The sample was then centrifuged at  
62 9,000  $\times$  g at a temperature of 4 °C and the supernatant subsequently separated. The supernatant was

63 dried by stripping with nitrogen then dissolved in methanol and water (25  $\mu$ L, methanol:water – 70:30  
64 v/v) and immediately analysed by HPLC-ESI-MS/MS.

65 The LC-ESI-MS/MS system consisted of an Accela 1250 LC chromatogram (Thermo Scientific,  
66 USA), an Open Accela autosampler (Thermo Scientific, USA) and a TSQ Vantage mass spectrometer  
67 (Thermo Scientific, USA). The analytes were separated on a 100  $\times$  2.1 mm 1.7  $\mu$ m C18 Kinetex  
68 column (Phenomenex, USA) with a mobile phase (solvent A: 5 mM ammonium acetate, Solvent B:  
69 acetonitrile, solvent C: methanol) in a gradient elution with a flow rate of 200  $\mu$ L/min. The HPLC  
70 elution program was as follows: 75% A, 20% B, 5% C (3 min)  $\rightarrow$  50% A, 45% B, 5% C (linear  
71 increase over 40 min, held for 5 min)  $\rightarrow$  75% A, 20% B, 5% C (linear decrease over 1 min, held for  
72 5 min). The column temperature was maintained at 30  $^{\circ}$ C and the sample temperature at 4  $^{\circ}$ C.  
73 Injection volume was 10  $\mu$ L. The analytes were eluted with the following retention times:  
74 9-(*ZE*)-HODE = 36.6 min, 9-(*EE*)-HODE = 39.2 min, 13-(*ZE*)-HODE = 35.4 min,  
75 13-(*EE*)-HODE = 37.2 min, and 8-iso-prostaglandin  $F_{2\alpha}$  = 9.4 min. A mass spectrometer equipped  
76 with electrospray ionisation (ESI) was used for detecting HODEs, 8-iso-prostaglandin  $F_{2\alpha}$  and their  
77 deuterium labelled internal standards (9-HODE- $d_4$ , 13-HODE- $d_4$ , 8-iso-prostaglandin  $F_{2\alpha}$ - $d_4$ ) in  
78 negative ionisation mode (ESI $^{-}$ ). The selective reaction monitoring mode was used. The scan  
79 monitoring reactions (precursor ion  $\rightarrow$  fragment ion) used for the analyses and their collision induced  
80 dissociated (CID) energy were as follows:  $m/z$  = 295.4 Da (corresponding with  $[M-H]^{-}$  ions)  $\rightarrow$   
81  $m/z$  = 171.5 Da (corresponding with fragmentation ion) (CID = 22eV) for 9-(*ZE*)-HODE and  
82 9-(*EE*)-HODE;  $m/z$  = 299.4 Da  $\rightarrow$   $m/z$  = 175.5 Da (CID = 22eV) for 9-HODE- $d_4$ ;  $m/z$  = 295.4 Da  $\rightarrow$   
83  $m/z$  = 194.6 Da (CID = 21eV) for 13-(*ZE*)-HODE; and 13-(*EE*)-HODE,  $m/z$  = 299.4 Da  $\rightarrow$   
84  $m/z$  = 198.6 Da (CID = 21eV) for 13-HODE- $d_4$ ;  $m/z$  = 299.4 Da  $\rightarrow$   $m/z$  = 198.6 Da (CID = 21eV);  
85  $m/z$  = 353.5 Da  $\rightarrow$   $m/z$  = 193.1 Da (CID = 22eV) for 8-iso-prostaglandin  $F_{2\alpha}$ , and  $m/z$  = 357.5 Da  $\rightarrow$   
86  $m/z$  = 197.1 Da (CID = 22eV) for 8-iso-prostaglandin  $F_{2\alpha}$ - $d_4$ . The optimised conditions on the mass  
87 spectrometer were as follows: spray voltage = 2500 V, temperature of ion transfer tube = 300  $^{\circ}$ C,  
88 temperature of H-ESI vaporiser = 300  $^{\circ}$ C, pressure of sheath gas (nitrogen) = 35 psi, and flow of

89 auxiliary gas (nitrogen) set at 10 arbitrary units. The data were acquired and processed using Xcalibur  
90 v. 2.1.0 software (Thermo Scientific, USA).

91 The validation parameters (accuracy, precision, recovery and limit of detection and  
92 quantification) were assessed by analysing five different concentration levels (LOQ, 5, 10, 50 and  
93 100 pg/ $\mu$ l) of the particular substances (9-(*ZE*)-HODE, 9-(*EE*)-HODE, 13-(*ZE*)-HODE,  
94 13-(*EE*)-HODE, and 8-iso-prostaglandin F<sub>2 $\alpha$</sub> ). The values of the validation parameters for each  
95 particular substrate were summarised in Supplementary table S2.

96

97 **Table S4.** Validation parameters of the LC-MS methods for determination of HODEs and  
98 8-iso-prostaglandin F<sub>2 $\alpha$</sub>

| Analyte                                   | Precision | Accuracy | Recovery | LOD           | LOQ           |
|-------------------------------------------|-----------|----------|----------|---------------|---------------|
|                                           | RSD (%)   | RE (%)   | (%)      | (pg/ $\mu$ l) | (pg/ $\mu$ l) |
| 9-( <i>ZE</i> )-HODE                      | 16.7      | -15.9    | 84.1     | 0.04          | 0.05          |
| 9-( <i>EE</i> )-HODE                      | 16.5      | -16.2    | 83.8     | 0.05          | 0.06          |
| 13-( <i>ZE</i> )-HODE                     | 18.3      | -14.8    | 85.2     | 0.06          | 0.07          |
| 13-( <i>EE</i> )-HODE                     | 18.1      | -15.0    | 85.0     | 0.05          | 0.06          |
| 8-iso-PGF <sub>2<math>\alpha</math></sub> | 14.6      | -12.8    | 87.2     | 0.08          | 0.09          |

99
